# Supplementary material
Source: PubMed Central journal article supplement (PMC2444008)
Supplement: supp_P800011-JLR200_Supp_Tables.pdf [file supp_P800011-JLR200_Supp_Tables.pdf]

Supplementary Table 1. Associations between APOA5 c.553G>T and Triglycerides.

|                                | Unadjusted Model |                  |         | Adjusted Model   |         |
|--------------------------------|------------------|------------------|---------|------------------|---------|
|                                | n                | OR (95% CI)      | p-value | OD (95% CI)      | p-value |
| Chinese Americans              | 300              | 4.45 (2.18-9.07) | <0.001  | 4.27 (1.91-9.56) | <0.001  |
| Non-Chinese<br>American Asians | 240              | 2.75 (1.32-5.74) | 0.007   | 2.28 (1.00-5.18) | 0.050   |

CI, confidence interval; OR, odds ratio. Model adjusted for sex, age, diabetes, and BMI.

Supplementary Table 2. Characteristics of non-Chinese-American Asian groups.

| Variable                    | High-TG (n = 139) | Low-Tg (n = 101) | p-value              |
|-----------------------------|-------------------|------------------|----------------------|
| Age (years)                 | 47.5±1.5          | 43.0±1.9         | 0.064 <sup>a</sup>   |
| Female (%)                  | 43.5              | 69.3             | <0.001 <sup>b</sup>  |
| BMI (kg/m <sup>2</sup> )    | 26.1±0.4 (129)    | 23.5±0.4 (96)    | <0.001 <sup>a</sup>  |
| Total Cholesterol           | 286.3±9.5         | 234.3±6.5        | <0.001 <sup>a</sup>  |
| Triglycerides               | 524.9±63.5        | 95.8±2.6         | *                    |
| VLDL-C                      | 102.9±15.4 (83)   | 11.4±0.6 (67)    | <0.001 <sup>a</sup>  |
| VLDL-TG                     | 416.4±61.1 (83)   | 46.4±2.8 (67)    | <0.001 <sup>a</sup>  |
| LDL-C                       | 153.3±5.9 (119)   | 156.1±6.3 (100)  | 0.745 <sup>a</sup>   |
| LDL-TG                      | 56.6±3.9 (83)     | 31.0±1.4 (67)    | <0.001 <sup>a</sup>  |
| HDL-C                       | 43.0±1.3 (129)    | 63.9±2.3 (100)   | <0.001 <sup>a</sup>  |
| MI, %                       | 14.1 (135)        | 8.0 (100)        | 0.149 <sup>b</sup>   |
| angina, %                   | 17.2 (128)        | 10.5 (95)        | 0.161 <sup>b</sup>   |
| family history CAD, %       | 40.7 (113)        | 44.9 (89)        | 0.546 <sup>b</sup>   |
| Stroke, %                   | 5.2 (134)         | 1.0 (100)        | 0.079 <sup>b</sup>   |
| Diabetes, %                 | 22.2 (135)        | 6.0 (100)        | 0.0006 <sup>b</sup>  |
| Hypertension, %             | 51.9 (135)        | 23.0 (100)       | <0.001 <sup>b</sup>  |
| c.553T allele frequency (%) | 13.7 (139)        | 5.4 (100)        | <0.0001 <sup>b</sup> |

BMI, body mass index; VLDL-C very-low-density lipoprotein cholesterol; VLDL-TG, very-low-density lipoprotein triglyceride; LDL-C, low-density lipoprotein cholesterol; LDL-TG, low-density lipoprotein triglyceride; HDL-C, high-density lipoprotein cholesterol. Values are ± SEM with the numbers of subjects in each instance in parenthesis. \* Use of these variables as a case selection criterion precludes reporting of a statistical significance. <sup>a</sup> p values calculated by unpaired Student's t test (TG values were log-transformed prior to testing); <sup>b</sup> by chi-square test.

Supplementary Table 3. Effect of second allele haplotype on levels of lipids and lipoproteins in c.553G>T heterozygotes.

|                   | Haplotype 5<br>(n = 27) | Haplotypes 4,6 or 7<br>(n = 57) | p-value            |
|-------------------|-------------------------|---------------------------------|--------------------|
| Total Cholesterol | 312 ± 31                | 267 ± 15                        | 0.141              |
| Triglycerides     | 832 ± 216               | 444 ± 70                        | 0.018 <sup>a</sup> |
| VLDL-C            | 188 ± 46                | 86 ± 26                         | 0.040              |
| VLDL-TG           | 811 ± 268               | 332 ± 94                        | 0.004 <sup>a</sup> |
| LDL-C             | 111 ± 8                 | 138 ± 9                         | 0.055              |
| LDL-TG            | 68 ± 8                  | 53 ± 6                          | 0.138              |
| HDL-C             | 39 ± 3                  | 49 ± 3                          | 0.019              |

All lipid values are mg/dl and are expressed as mean ± SEM. <sup>a</sup>Calculated from log-transformed data.

Supplementary Table 4. Multiple Regression Analysis of Odds of HTG

| Predictor    | Odds Ratio | Standard Error | 95% CI       | p-value |
|--------------|------------|----------------|--------------|---------|
| Genotype     | 3.10       | 0.865          | 1.797, 5.359 | <0.0005 |
| Sex          | 1.80       | 0.371          | 1.199, 2.695 | 0.005   |
| BMI          | 1.11       | 0.030          | 1.055, 1.171 | <0.0005 |
| Diabetes     | 2.36       | 0.800          | 1.215, 4.588 | 0.011   |
| Hypertension | 2.01       | 0.478          | 1.260, 3.201 | 0.003   |
| Age          | 1.00       | 0.006          | 0.993, 1.017 | 0.415   |

Predictors evaluated in the model for HTG included: APOA5 genotype (wild type genotype being the referent group), sex (female sex being the referent group), body mass index (change in odds per 1 m/kg<sup>2</sup> change in BMI), age (change in odds per year in age), diabetes status (non-diabetic being the referent group), and hypertension (normotensive being the referent group), and interaction terms for: genotype and sex, genotype and BMI, genotype and age, genotype and diabetes status, and genotype and hypertensive status. The model accounts for 13.78% of the variance in odds of HTG (p<0.0005)
